# Supplementary material
Source: HighWire-hosted journal article supplement (https://erj.ersjournals.com/content/60/3/2102404)
Supplement: inline-supplementary-material-2 [file inline-supplementary-material-2.pdf]

**Supplementary Table S2: Detailed clinical characteristics and outcome of transplanted COVID-19 ARDS patients (n=19).**

|                                                             | #1                                                                                                                                                                     | #2                                                                                                                   | #3                                                                                                                                                              | #4                                                                                                        | #5                                                                                          | #6                                                                                                                        | #7                                                                                                                                                                                               | #8                                                                                                                                                                                                              | #9                                                                                                |
|-------------------------------------------------------------|------------------------------------------------------------------------------------------------------------------------------------------------------------------------|----------------------------------------------------------------------------------------------------------------------|-----------------------------------------------------------------------------------------------------------------------------------------------------------------|-----------------------------------------------------------------------------------------------------------|---------------------------------------------------------------------------------------------|---------------------------------------------------------------------------------------------------------------------------|--------------------------------------------------------------------------------------------------------------------------------------------------------------------------------------------------|-----------------------------------------------------------------------------------------------------------------------------------------------------------------------------------------------------------------|---------------------------------------------------------------------------------------------------|
| Age                                                         | 44                                                                                                                                                                     | 55                                                                                                                   | 54                                                                                                                                                              | 57                                                                                                        | 61                                                                                          | 54                                                                                                                        | 49                                                                                                                                                                                               | 64                                                                                                                                                                                                              | 56                                                                                                |
| Gender                                                      | female                                                                                                                                                                 | Male                                                                                                                 | Male                                                                                                                                                            | Male                                                                                                      | Male                                                                                        | Male                                                                                                                      | Male                                                                                                                                                                                             | Male                                                                                                                                                                                                            | Male                                                                                              |
| Length of MV until LTx (days)                               | 52                                                                                                                                                                     | 29                                                                                                                   | 55                                                                                                                                                              | 57                                                                                                        | 50                                                                                          | 39                                                                                                                        | 41                                                                                                                                                                                               | 28                                                                                                                                                                                                              | 30                                                                                                |
| Length of ECMO support until LTx (days)                     | 45                                                                                                                                                                     | 23                                                                                                                   | 47                                                                                                                                                              | 46                                                                                                        | 43                                                                                          | 27                                                                                                                        | 41                                                                                                                                                                                               | 17                                                                                                                                                                                                              | 2                                                                                                 |
| History of septic episodes on ICU                           | No                                                                                                                                                                     | No                                                                                                                   | No                                                                                                                                                              | No                                                                                                        | No                                                                                          | No                                                                                                                        | No                                                                                                                                                                                               | No                                                                                                                                                                                                              | No                                                                                                |
| CT findings                                                 | bilateral consolidations, signs of lung necrosis                                                                                                                       | bilateral consolidations, bilateral pneumothoraces, left sided pleural effusion, right-sided traction bronchiectasis | bilateral consolidations, signs of pulmonary embolism, bilateral pleural effusion                                                                               | bilateral consolidations with pleural effusions                                                           | bilateral consolidations, left-sided pleural effusion, right-sided hemorrhage               | bilateral pleural effusions, traction bronchiectasis                                                                      | bilateral consolidations with pleural effusion                                                                                                                                                   | bilateral consolidations, multiple aerobronchogram and pleural effusions                                                                                                                                        | bilateral consolidations with aerobronchogram and signs of fibrotic remodeling                    |
| Pneumothorax requiring chest tube insertion                 | No                                                                                                                                                                     | Yes                                                                                                                  | No                                                                                                                                                              | Yes                                                                                                       | No                                                                                          | No                                                                                                                        | No                                                                                                                                                                                               | No                                                                                                                                                                                                              | No                                                                                                |
| Pulmonary haemorrhage                                       | Yes                                                                                                                                                                    | Yes                                                                                                                  | No                                                                                                                                                              | Yes                                                                                                       | Yes                                                                                         | No                                                                                                                        | No                                                                                                                                                                                               | No                                                                                                                                                                                                              | no                                                                                                |
| Lung compliance at time of listing (mL/cm H <sub>2</sub> O) | 2.6                                                                                                                                                                    | 9.7                                                                                                                  | 8.3                                                                                                                                                             | 7.5                                                                                                       | 6.8                                                                                         | 11.1                                                                                                                      | N/A                                                                                                                                                                                              | 0.8                                                                                                                                                                                                             | 12.4                                                                                              |
| Reason for failure of native lung recovery                  | Bilateral large necrotic areas in the parenchyma, nearly complete absence of alveolar ventilation, no clinical improvement despite >6 weeks ECMO support + >7 weeks MV | Recurrent pneumo,- and hemothoraces                                                                                  | Severe pulmonary embolism in combination with multiresistant antimicrobial colonization and no clinical improvement despite >6 weeks ECMO support + >7 weeks MV | Recurrent pneumo,- and hemothoraces , no clinical improvement despite >6 weeks ECMO support + >8 weeks MV | Recurrent hemothoraces, no clinical improvement despite >6 weeks ECMO support + >7 weeks MV | Increasing circulatory and respiratory instability, no clinical improvement despite >3 weeks ECMO support and >5 weeks MV | No clinical and radiological improvement despite >5 weeks ECMO support + MV, continuously increasing pulmonary arterial pressures during ICU stay and evidence of encapsulated pleural effusions | nearly complete absence of alveolar ventilation, increasing hemodynamic instability while fully dependent on ECMO support, fully consolidated lungs with evidence of encapsulated pleural effusions in chest CT | Severe bilateral consolidations and evidence of irreversible fibrotic changes affecting all lobes |
| Maximum AKI stage during ICU stay                           | no AKI                                                                                                                                                                 | 3                                                                                                                    | no AKI                                                                                                                                                          | 3                                                                                                         | no AKI                                                                                      | no AKI                                                                                                                    | no AKI                                                                                                                                                                                           | no AKI                                                                                                                                                                                                          | no AKI                                                                                            |
| AKI stage at time of listing                                | no AKI                                                                                                                                                                 | 3                                                                                                                    | no AKI                                                                                                                                                          | 3                                                                                                         | no AKI                                                                                      | no AKI                                                                                                                    | no AKI                                                                                                                                                                                           | no AKI                                                                                                                                                                                                          | no AKI                                                                                            |
| Type of LTx                                                 | Bilateral, no size reduction                                                                                                                                           | Bilateral, no size reduction                                                                                         | Trilobar (right upper + right lower + left upper lobe)                                                                                                          | Bilateral, size-reduced (without middle lobe + lingula)                                                   | Bilateral, size-reduced (without middle lobe + lingula)                                     | Bilateral, no size reduction                                                                                              | Bilateral, no size reduction                                                                                                                                                                     | Bilateral, no size reduction                                                                                                                                                                                    | Bilateral, no size reduction                                                                      |
| Postop ECMO prolongation                                    | Yes                                                                                                                                                                    | no                                                                                                                   | Yes                                                                                                                                                             | No                                                                                                        | No                                                                                          | No                                                                                                                        | No                                                                                                                                                                                               | Yes                                                                                                                                                                                                             | No                                                                                                |
| Time until able to dangle at bedside (days)                 | 24                                                                                                                                                                     | 8                                                                                                                    | 19                                                                                                                                                              | 18                                                                                                        | Not reached                                                                                 | 12                                                                                                                        | 5                                                                                                                                                                                                | 5                                                                                                                                                                                                               | 6                                                                                                 |
| Time until able to stand with help (days)                   | 36                                                                                                                                                                     | 25                                                                                                                   | 96                                                                                                                                                              | 49                                                                                                        | Not reached                                                                                 | 23                                                                                                                        | 7                                                                                                                                                                                                | 20                                                                                                                                                                                                              | 22                                                                                                |
| Length of ICU stay                                          | 63                                                                                                                                                                     | 55                                                                                                                   | 98                                                                                                                                                              | 80                                                                                                        | Not reached                                                                                 | 37                                                                                                                        | 12                                                                                                                                                                                               | 32                                                                                                                                                                                                              | 27                                                                                                |
| Length of overall hospital stay                             | 108                                                                                                                                                                    | 68                                                                                                                   | 134                                                                                                                                                             | Not reached                                                                                               | Not reached                                                                                 | 68                                                                                                                        | 54                                                                                                                                                                                               | 40                                                                                                                                                                                                              | 57                                                                                                |
| Major postoperative complications                           | hemothorax → revision, CIP, candida encephalitis                                                                                                                       | CIP, temporary atrial fibrillation, secondary sclerosing cholangitis                                                 | reperfusion edema, wound infection, coagulation dysfunction, temporary hemofiltration, CIP, subdural hematoma                                                   | CIP, hemothorax → revision, renal replacement therapy, secondary sclerosing cholangitis                   | CIP, secondary sclerosing cholangitis                                                       | CIP, wound infection, temporary renal replacement therapy                                                                 | CIP, thrombosis of the subclavian and ulnar artery, gastrointestinal hemorrhage                                                                                                                  | CIP, hemothorax → revision, renal replacement therapy, secondary sclerosing cholangitis                                                                                                                         | CIP, phrenic nerve lesion palsy → diaphragm plication                                             |
| Discharged from hospital                                    | Yes                                                                                                                                                                    | Yes                                                                                                                  | No                                                                                                                                                              | No                                                                                                        | No                                                                                          | Yes                                                                                                                       | Yes                                                                                                                                                                                              | Yes                                                                                                                                                                                                             | Yes                                                                                               |
| Follow up (days)                                            | 450                                                                                                                                                                    | 300                                                                                                                  | 147                                                                                                                                                             | 154                                                                                                       | 66                                                                                          | 207                                                                                                                       | 189                                                                                                                                                                                              | 180                                                                                                                                                                                                             | 162                                                                                               |
| Alive / dead (cause of death)                               | alive                                                                                                                                                                  | alive                                                                                                                | dead (subdural hematoma)                                                                                                                                        | dead (liver failure)                                                                                      | dead (liver failure)                                                                        | alive                                                                                                                     | alive                                                                                                                                                                                            | alive                                                                                                                                                                                                           | alive                                                                                             |

MV= mechanical ventilation; ECMO = extracorporeal membrane oxygenation; ICU = intensive care unit; CT = computed tomography; AKI = acute kidney injury; N/A = not applicable; CIP = critical illness polyneuropathy;

|                                                             | #10                                                                                                 | #11                                                                                                                                                               | #12                                                                                                                                                               | #13                                                                                | #14                                                                                       | #15                                                                            | #16                                                                                                         | #17                                                                                  | #18                                                                 | #19                                                                                          |
|-------------------------------------------------------------|-----------------------------------------------------------------------------------------------------|-------------------------------------------------------------------------------------------------------------------------------------------------------------------|-------------------------------------------------------------------------------------------------------------------------------------------------------------------|------------------------------------------------------------------------------------|-------------------------------------------------------------------------------------------|--------------------------------------------------------------------------------|-------------------------------------------------------------------------------------------------------------|--------------------------------------------------------------------------------------|---------------------------------------------------------------------|----------------------------------------------------------------------------------------------|
| Age                                                         | 46                                                                                                  | 64                                                                                                                                                                | 58                                                                                                                                                                | 34                                                                                 | 61                                                                                        | 56                                                                             | 53                                                                                                          | 47                                                                                   | 62                                                                  | 57                                                                                           |
| Gender                                                      | Female                                                                                              | Male                                                                                                                                                              | Male                                                                                                                                                              | Female                                                                             | Male                                                                                      | Male                                                                           | Male                                                                                                        | Male                                                                                 | Male                                                                | Male                                                                                         |
| Length of MV until LTx (days)                               | 52                                                                                                  | 60                                                                                                                                                                | 50                                                                                                                                                                | 46                                                                                 | 51                                                                                        | 38                                                                             | 76                                                                                                          | 38                                                                                   | 47                                                                  | 82                                                                                           |
| Length of ECMO support until LTx                            | 52                                                                                                  | 23                                                                                                                                                                | 8                                                                                                                                                                 | 45                                                                                 | 43                                                                                        | 29                                                                             | 66                                                                                                          | 36                                                                                   | 34                                                                  | 59                                                                                           |
| History of septic episodes on ICU                           | Yes                                                                                                 | No                                                                                                                                                                | Yes                                                                                                                                                               | No                                                                                 | Yes                                                                                       | No                                                                             | No                                                                                                          | Yes                                                                                  | Yes                                                                 | No                                                                                           |
| CT findings                                                 | bilateral consolidations with pneumothoraces                                                        | bilateral consolidations with signs of fibrotic remodeling affecting all lobes                                                                                    | bilateral consolidations with traction bronchiectasis and pleural effusions                                                                                       | bilateral consolidations with distinct areobronchogram and pleural effusion        | bilateral consolidations with pleural effusions, areobronchogram, traction bronchiectasis | bilateral consolidations, traction bronchiectasis, bilateral pleural effusions | bilateral consolidations with areobronchogram                                                               | bilateral consolidations, right-sided pneumothorax                                   | bilateral consolidations with pneumothoraces, in situ thrombosis    | bilateral consolidations with areobronchogram and pleural effusions, traction bronchiectasis |
| Pneumothorax requiring chest tube insertion                 | yes                                                                                                 | no                                                                                                                                                                | no                                                                                                                                                                | No                                                                                 | No                                                                                        | No                                                                             | Yes                                                                                                         | Yes                                                                                  | No                                                                  | No                                                                                           |
| Pulmonary haemorrhage                                       | No                                                                                                  | no                                                                                                                                                                | No                                                                                                                                                                | no                                                                                 | No                                                                                        | No                                                                             | Yes                                                                                                         | No                                                                                   | No                                                                  | no                                                                                           |
| Lung compliance at time of listing (mL/cm H <sub>2</sub> O) | 6.0                                                                                                 | 7.9                                                                                                                                                               | 33.3                                                                                                                                                              | 4.8                                                                                | 12.6                                                                                      | 5.3                                                                            | N/A                                                                                                         | 27.9                                                                                 | 13.7                                                                | 8.8                                                                                          |
| Reason for failure of native lung recovery                  | Recurrent pneumothoraces, no clinical improvement despite >7 weeks ECMO support + MV                | Severe bilateral consolidations and evidence of irreversible fibrotic changes of the lungs, no clinical improvement despite >3 weeks ECMO support and >8 weeks MV | Evidence of severe traction bronchiectasis in combination with encapsulated pleural effusions, prolonged MV >7 weeks + no respiratory improvement on ECMO support | no clinical improvement despite >6 weeks ECMO support + MV                         | no clinical improvement despite >6 weeks ECMO support + MV                                | no clinical improvement despite >4 weeks ECMO support + >5 weeks MV            | Recurrent pneumo-, and hemothoraces, no clinical improvement despite >9 weeks ECMO support + >10 weeks MV   | Recurrent pneumothoraces, no clinical improvement despite >5 weeks ECMO support + MV | no clinical improvement despite >4 weeks ECMO support + >6 weeks MV | no clinical improvement despite >8 weeks ECMO support + >11 weeks MV                         |
| Maximum AKI stage during ICU stay                           | no AKI                                                                                              | 3                                                                                                                                                                 | no AKI                                                                                                                                                            | no AKI                                                                             | no AKI                                                                                    | no AKI                                                                         | no AKI                                                                                                      | no AKI                                                                               | no AKI                                                              | 3                                                                                            |
| AKI stage at time of listing                                | no AKI                                                                                              | 3                                                                                                                                                                 | no AKI                                                                                                                                                            | no AKI                                                                             | no AKI                                                                                    | no AKI                                                                         | no AKI                                                                                                      | no AKI                                                                               | no AKI                                                              | 3                                                                                            |
| Type of LTx                                                 | Bilateral, no size reduction                                                                        | Bilateral, no size reduction                                                                                                                                      | Bilateral, no size reduction                                                                                                                                      | Bilateral, size-reduced (without middle lobe + lingula)                            | Bilateral, size-reduced (without middle lobe + lingula)                                   | Bilateral, no size reduction                                                   | Bilateral, no size reduction                                                                                | Bilateral, no size reduction                                                         | Bilateral, size-reduced (without middle lobe + lingula)             | Bilateral, no size reduction                                                                 |
| Postop ECMO prolongation                                    | Yes                                                                                                 | No                                                                                                                                                                | No                                                                                                                                                                | No                                                                                 | Yes                                                                                       | No                                                                             | Yes                                                                                                         | No                                                                                   | No                                                                  | No                                                                                           |
| Time until able to dangle at bedside (days)                 | 13                                                                                                  | 12                                                                                                                                                                | 7                                                                                                                                                                 | 10                                                                                 | 6                                                                                         | 8                                                                              | 44                                                                                                          | 11                                                                                   | 10                                                                  | 14                                                                                           |
| Time until able to stand with help (days)                   | Not reached                                                                                         | 55                                                                                                                                                                | 20                                                                                                                                                                | 20                                                                                 | 26                                                                                        | 16                                                                             | Not reached                                                                                                 | Not reached                                                                          | 15                                                                  | Not reached                                                                                  |
| Length of ICU stay                                          | 90                                                                                                  | Not reached                                                                                                                                                       | 25                                                                                                                                                                | 25                                                                                 | 27                                                                                        | 37                                                                             | Still admitted                                                                                              | 34                                                                                   | 30                                                                  | Still admitted                                                                               |
| Length of overall hospital stay                             | Not reached                                                                                         | Not reached                                                                                                                                                       | 49                                                                                                                                                                | 64                                                                                 | Still admitted                                                                            | 50                                                                             | Still admitted                                                                                              | Not reached                                                                          | 70                                                                  | Still admitted                                                                               |
| Major postoperative complications                           | CIP, intermittent atrial fibrillation, multiple venous thrombosis, secondary sclerosing cholangitis | CIP, renal insufficiency with replacement therapy required, bacterial pneumonia, secondary sclerosing cholangitis                                                 | CIP, jugular vein thrombosis, secondary sclerosing cholangitis, SIADH                                                                                             | CIP, posterior reversible encephalopathy syndrom, secondary sclerosing cholangitis | Pneumothorax → drainage, renal insufficiency, secondary sclerosing cholangitis            | right side hemothorax → revision, CIP, temporary renal failure                 | hemothorax → revision, choledocholithiasis with repeat endoscopic intervention, esophageal perforation, CIP | CIP, secondary sclerosing cholangitis, temporary renal replacement therapy           | CIP, abdominal hematoma, wound infection                            | hemothorax → multiple revisions, wound infection                                             |
| Discharged from hospital                                    | No                                                                                                  | no                                                                                                                                                                | Yes                                                                                                                                                               | yes                                                                                | no                                                                                        | yes                                                                            | No                                                                                                          | No                                                                                   | No                                                                  | no                                                                                           |
| Follow up (days)                                            | 154                                                                                                 | 111                                                                                                                                                               | 133                                                                                                                                                               | 115                                                                                | 105                                                                                       | 93                                                                             | 85                                                                                                          | 65                                                                                   | 69                                                                  | 47                                                                                           |
| Alive / dead (cause of death)                               | alive                                                                                               | dead (multi-organ failure)                                                                                                                                        | alive                                                                                                                                                             | alive                                                                              | alive                                                                                     | alive                                                                          | alive                                                                                                       | dead (liver failure)                                                                 | alive                                                               | alive                                                                                        |

MV= mechanical ventilation; ECMO = extracorporeal membrane oxygenation; ICU = intensive care unit; CT = computed tomography; N/A = not applicable; AKI = acute kidney injury; CIP = critical illness polyneuropathy; SIADH = syndrome of inappropriate antidiuretic hormone secretion
