# Supplementary material
Source: HighWire-hosted journal article supplement (https://erj.ersjournals.com/content/60/3/2102404)
Supplement: inline-supplementary-material-3 [file inline-supplementary-material-3.pdf]

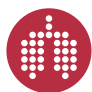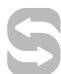

SHAREABLE PDF

# Clinical relevance of lung transplantation for COVID-19 ARDS: a nationwide study

Christian Lang<sup>1</sup>, Valentin Ritschl<sup>2,3</sup>, Florian Augustin<sup>4</sup>, Gyoergy Lang<sup>1</sup>, Bernhard Moser<sup>1</sup>, Shahrokh Taghavi<sup>1</sup>, Gabriella Murakoezy<sup>1</sup>, Christopher Lambers<sup>5</sup>, Holger Flick<sup>6</sup>, Markus Koestenberger<sup>7</sup>, Roxane Brooks<sup>8</sup>, Tina Muhr<sup>9</sup>, Johann Knotzer<sup>10</sup>, Daniel Mydza<sup>11</sup>, Marc Kaufmann<sup>12</sup>, Thomas Staudinger<sup>13</sup>, Christian Zauner<sup>14</sup>, Claus Krenn<sup>15</sup>, Eva Schaden<sup>15,16</sup>, Andreas Bacher<sup>17</sup>, Bernhard Rössler<sup>18</sup>, Peter Faybik<sup>19</sup>, Edda Tschernko<sup>20</sup>, Maria Anwar<sup>20</sup>, Klaus Markstaller<sup>21</sup>, Daniel Hoefler<sup>22</sup>, Tanja Stamm<sup>2,3</sup>, Peter Jaksch<sup>1</sup> and Konrad Hoetzenecker<sup>1</sup>

<sup>1</sup>Dept of Thoracic Surgery, Medical University of Vienna, Vienna, Austria. <sup>2</sup>Section for Outcomes Research, Center for Medical Statistics, Informatics and Intelligent Systems, Medical University of Vienna, Vienna, Austria. <sup>3</sup>Ludwig Boltzmann Institute for Arthritis and Rehabilitation, Vienna, Austria. <sup>4</sup>Dept of Visceral, Transplant and Thoracic Surgery, Medical University of Innsbruck, Innsbruck, Austria. <sup>5</sup>Dept of Pneumology, Ordensklinikum Linz Elisabethinen Hospital, Linz, Austria. <sup>6</sup>Division of Pulmonology, Medical University of Graz, Graz, Austria. <sup>7</sup>Dept of Anaesthesiology and Intensive Care, Klinikum Klagenfurt am Wörthersee, Klagenfurt am Wörthersee, Austria. <sup>8</sup>Intensive Care Unit 1, Clinic of Anaesthesiology and Intensive Care Medicine, Johannes Kepler University Linz, Linz, Austria. <sup>9</sup>Intensive Care Unit, Division of Cardiology, Dept of Internal Medicine, State Hospital (LKH) Graz II, Graz, Austria. <sup>10</sup>Dept of Anaesthesiology and Critical Care Medicine, Klinikum Wels – Grieskirchen, Wels, Austria. <sup>11</sup>1st Medical Dept, Klinik Favoriten, Vienna, Austria. <sup>12</sup>Dept of Anaesthesiology and Intensive Care Unit, Bozen Central Hospital, Bozen, Italy. <sup>13</sup>Intensive Care Unit 13i2, Dept of Internal Medicine I, Medical University of Vienna, Vienna, Austria. <sup>14</sup>Intensive Care Unit 13H1, Dept of Internal Medicine III, Medical University of Vienna, Vienna, Austria. <sup>15</sup>Intensive Care Unit 13C1, Dept of Anaesthesia, Intensive Care Medicine and Pain Medicine, Medical University of Vienna, Vienna, Austria. <sup>16</sup>Ludwig Boltzmann Institute for Digital Health and Patient Safety (LBI-DHPS), Medical University of Vienna, Vienna, Austria. <sup>17</sup>Intensive Care Unit 13C2, Dept of Anaesthesia, Intensive Care Medicine and Pain Medicine, Medical University of Vienna, Vienna, Austria. <sup>18</sup>Intensive Care Unit 9D, Dept of Anaesthesia, Intensive Care Medicine and Pain Medicine, Medical University of Vienna, Vienna, Austria. <sup>19</sup>Intensive Care Unit 13C3, Dept of Anaesthesia, Intensive Care Medicine and Pain Medicine, Medical University of Vienna, Vienna, Austria. <sup>20</sup>Division of Cardiac, Thoracic and Vascular Anaesthesia and Intensive Care, Medical University of Vienna, Vienna, Austria. <sup>21</sup>Dept of Anaesthesia, Intensive Care Medicine and Pain Medicine, Medical University of Vienna, Vienna, Austria. <sup>22</sup>Dept of Cardiac Surgery, Medical University of Innsbruck, Innsbruck, Austria.

Corresponding author: Konrad Hoetzenecker ([konrad.hoetzenecker@meduniwien.ac.at](mailto:konrad.hoetzenecker@meduniwien.ac.at))

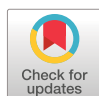

Shareable abstract (@ERSpublications)

Lung transplantation offers excellent midterm outcomes and should be incorporated in the treatment algorithm of post-COVID-19 ARDS patients <https://bit.ly/33Djghz>

**Cite this article as:** Lang C, Ritschl V, Augustin F, et al. Clinical relevance of lung transplantation for COVID-19 ARDS: a nationwide study. *Eur Respir J* 2022; 60: 2102404 [DOI: 10.1183/13993003.02404-2021].

This single-page version can be shared freely online.

Copyright ©The authors 2022.

This version is distributed under the terms of the Creative Commons Attribution Non-Commercial Licence 4.0. For commercial reproduction rights and permissions contact [permissions@ersnet.org](mailto:permissions@ersnet.org)

Received: 3 Sept 2021  
Accepted: 13 Jan 2022

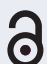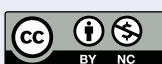

## Abstract

**Background** Although the number of lung transplantations (LTx) performed worldwide for coronavirus disease 2019 (COVID-19)-induced acute respiratory distress syndrome (ARDS) is still low, there is general agreement that this treatment can save a subgroup of the most severely ill patients with irreversible lung damage. However, the true proportion of patients eligible for LTx, the overall outcome and the impact of LTx on the pandemic are unknown.

**Methods** A retrospective analysis was performed using a nationwide registry of hospitalised patients with confirmed severe acute respiratory syndrome coronavirus type 2 (SARS-CoV-2) infection admitted between 1 January 2020 and 30 May 2021 in Austria. Patients referred to one of the two Austrian LTx centres were analysed, and grouped into patients accepted and rejected for LTx. Detailed outcome analysis was performed for all patients who received a LTx for post-COVID-19 ARDS and compared with patients who underwent LTx for other indications.

**Results** Between 1 January 2020 and 30 May 2021, 39 485 patients were hospitalised for COVID-19 in Austria. 2323 required mechanical ventilation and 183 received extracorporeal membrane oxygenation (ECMO) support. 106 patients with severe COVID-19 ARDS were referred for LTx. Of these, 19 (18%)

underwent LTx. 30-day mortality after LTx was 0% for COVID-19 ARDS transplant recipients. At a median follow-up of 134 (47–450) days, 14 out of 19 patients were alive.

**Conclusions** Early referral of ECMO patients to a LTx centre is pivotal in order to select patients eligible for LTx. Transplantation offers excellent midterm outcomes and should be incorporated in the treatment algorithm of post-COVID-19 ARDS.
